# Supplementary material for: Improved cycle life and Li-ion transport parameters at low temperature in doped Ni-rich NMC cathodes
Source: Royal Society of Chemistry journal article supplement (doi:10.1039/d6ta01388k), 2026-04-23
Supplement: d6ta01388k1.pdf [file d6ta01388k1.pdf]

## Supporting Information

### Improved Cycle Life and Li-Ion Transport Parameters at Low Temperature in Doped Ni-Rich NMC Cathodes

Ethan Williams,<sup>a,c\*</sup> David Burnett,<sup>a,c</sup> Wilgner Lima da Silva,<sup>b,c</sup> Jack E. N. Swallow,<sup>d</sup> Ryan Parmenter,<sup>e</sup> Robert S. Weatherup,<sup>c,d</sup> Peter Slater,<sup>b,c</sup> and Emma Kendrick.<sup>a,c,\*</sup>

<sup>a</sup> School of Metallurgy and Materials, University of Birmingham, Edgbaston, Birmingham, B15 2TT, UK

<sup>b</sup> School of Chemistry, University of Birmingham, Edgbaston, Birmingham, B15 2TT, UK

<sup>c</sup> The Faraday Institution, Quad One, Becquerel Avenue, Harwell Campus, Didcot, OX11 0RA, UK

<sup>d</sup> Department of Materials, University of Oxford, Parks Road, Oxford OX1 3PH, United Kingdom

<sup>e</sup> School of Physical Sciences, University of Kent, Canterbury, Kent CT2 7NH, UK

\*Corresponding author(s): [e.kendrick@bham.ac.uk](mailto:e.kendrick@bham.ac.uk) and [etw078@student.bham.ac.uk](mailto:etw078@student.bham.ac.uk)

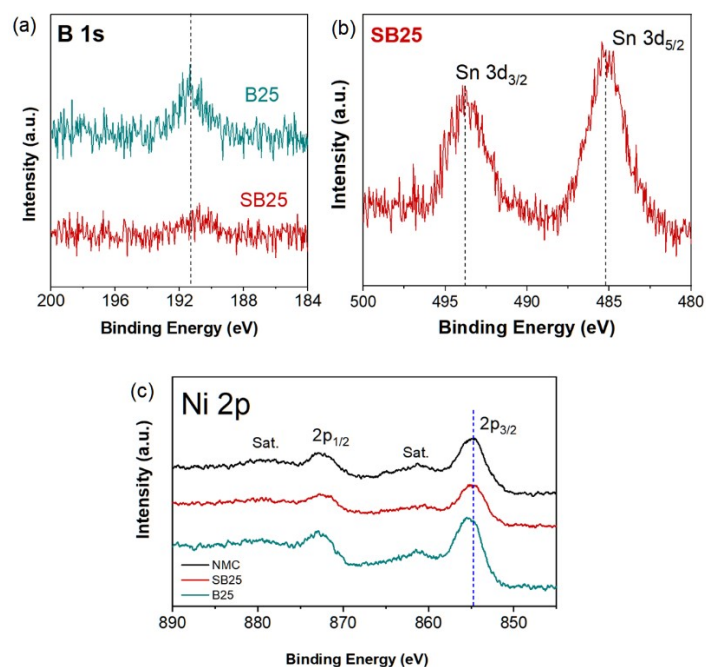

Figure S1: XPS spectra of the baseline and doped cathode powder materials, showing the (a) B 1s, (b) Ni 2p, and (c) Sn 3d regions.

Table S1: The threshold energies ( $E_0$ ) of the main edge of XANES Ni, Mn, and Co K-edge spectra for the powdered cathode and reference samples. [Ac] =  $\text{CH}_3\text{CO}_2^-$

| Ni K-edge           | $E_0$ / eV | Mn K-edge                      | $E_0$ / eV | Co K-edge                      | $E_0$ / eV |
|---------------------|------------|--------------------------------|------------|--------------------------------|------------|
| NMC                 | 8347.95    | NMC                            | 6556.42    | NMC                            | 7726.66    |
| B25                 | 8347.80    | B25                            | 6556.37    | B25                            | 7726.62    |
| SB25                | 8347.88    | SB25                           | 6556.46    | SB25                           | 7726.55    |
| NiO                 | 8345.53    | Mn[Ac] <sub>2</sub>            | 6547.97    | Co[Ac] <sub>2</sub>            | 7721.53    |
| Ni[Ac] <sub>2</sub> | 8345.92    | Mn <sub>2</sub> O <sub>3</sub> | 6552.56    | Co <sub>3</sub> O <sub>4</sub> | 7724.62    |
|                     |            | MnO <sub>2</sub>               | 6555.28    | LiCoO <sub>2</sub>             | 7725.70    |

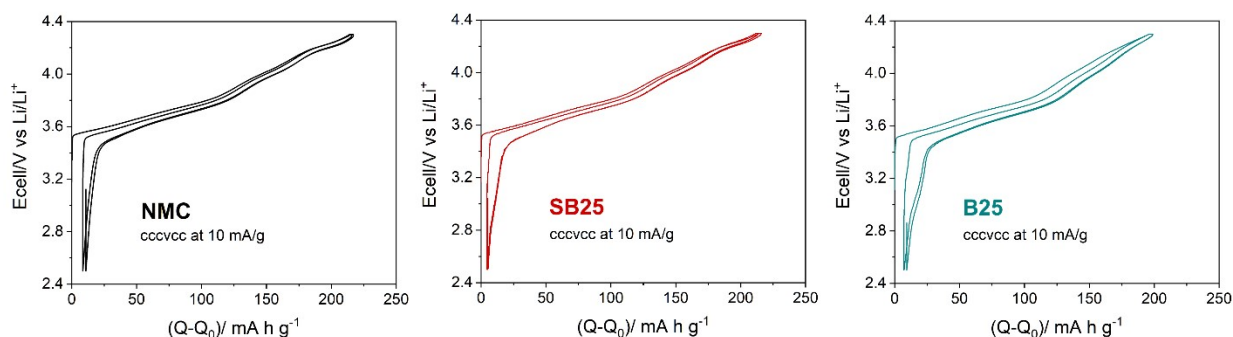

Figure S2: Formation profiles of the 1<sup>st</sup> and 2<sup>nd</sup> charge-discharge cycles of NMC, SB25, and B25 measured at 10 mA g<sup>-1</sup> between 4.3 – 2.5 V.

Table S2: Equivalent circuit element values taken from the fitted EIS results at different SOC recorded at room temperature.

| SOC % | NMC   |           |          |          | SB25  |           |          | B25   |           |          |
|-------|-------|-----------|----------|----------|-------|-----------|----------|-------|-----------|----------|
|       | $R_S$ | $R_{SEI}$ | $R_{CT}$ | $R_{CT}$ | $R_S$ | $R_{SEI}$ | $R_{CT}$ | $R_S$ | $R_{SEI}$ | $R_{CT}$ |
| 0     | 3.08  | 7.70      | 11.0     | 11.6     | 1.32  | 30.42     | 208      | 1.16  | 67.49     | 274.4    |
| 10    | 4.35  | 7.71      | 6.70     | 27.0     | 1.62  | 2.23      | 19.4     | 1.37  | 3.21      | 19.3     |
| 20    | 3.45  | 4.30      | 8.83     | 9.58     | 1.55  | 1.63      | 14.7     | 1.38  | 2.46      | 15.0     |
| 30    | 3.60  | 5.77      | 4.95     | 7.74     | 1.60  | 1.49      | 13.2     | 1.50  | 2.41      | 12.1     |
| 40    | 4.33  | 2.23      | 5.36     | 9.04     | 1.05  | 4.57      | 8.84     | 1.48  | 2.54      | 9.93     |
| 50    | 3.76  | 4.48      | 4.32     | 7.48     | 1.13  | 3.31      | 8.79     | 1.42  | 2.04      | 10.0     |
| 60    | 4.27  | 3.19      | 4.54     | 8.07     | 1.67  | 1.13      | 9.59     | 1.48  | 1.85      | 9.05     |
| 70    | 3.94  | 3.18      | 4.59     | 9.82     | 1.10  | 2.48      | 8.71     | 1.41  | 1.79      | 8.47     |
| 80    | 3.28  | 3.90      | 4.22     | 17.4     | 1.17  | 2.07      | 8.40     | 1.45  | 1.69      | 7.70     |
| 90    | 3.79  | 4.16      | 4.41     | 53.1     | 1.58  | 0.88      | 8.16     | 1.46  | 1.70      | 7.25     |
| 100   | 3.08  | 7.70      | 11.0     | 11.6     | 1.36  | 1.09      | 10.44    | 1.40  | 1.83      | 6.91     |

Table S3: Equivalent circuit element values taken from the fitted EIS results at different SOC recorded at 45°C

| SOC % | NMC   |           |          | SB25  |           |          | B25   |           |          |
|-------|-------|-----------|----------|-------|-----------|----------|-------|-----------|----------|
|       | $R_S$ | $R_{SEI}$ | $R_{CT}$ | $R_S$ | $R_{SEI}$ | $R_{CT}$ | $R_S$ | $R_{SEI}$ | $R_{CT}$ |

|     |       |      |      |      |      |      |       |       |      |
|-----|-------|------|------|------|------|------|-------|-------|------|
| 0   | 1.42  | 7.66 | 17.5 | 1.34 | 2.31 | 8.79 | 1.433 | 1.58  | 12.1 |
| 10  | 1.56  | 4.47 | 9.45 | 1.41 | 1.74 | 7.30 | 1.515 | 2.77  | 8.10 |
| 20  | 1.19  | 3.24 | 8.76 | 1.30 | 1.81 | 6.54 | 1.322 | 0.632 | 10.4 |
| 30  | 1.18  | 6.32 | 7.72 | 1.30 | 1.80 | 5.83 | 1.310 | 0.540 | 9.91 |
| 40  | 1.04  | 5.60 | 6.51 | 1.35 | 1.34 | 5.97 | 1.494 | 3.86  | 5.33 |
| 50  | 0.791 | 5.88 | 5.94 | 1.39 | 1.32 | 5.50 | 1.463 | 3.82  | 4.51 |
| 60  | 0.833 | 5.39 | 5.64 | 1.34 | 1.34 | 5.27 | 1.556 | 2.55  | 5.23 |
| 70  | 0.834 | 5.38 | 5.98 | 1.33 | 1.44 | 4.90 | 1.372 | 3.54  | 3.72 |
| 80  | 0.867 | 5.30 | 6.06 | 1.31 | 1.50 | 4.81 | 1.660 | 1.03  | 5.81 |
| 90  | 0.963 | 5.97 | 6.50 | 1.32 | 1.25 | 5.14 | 1.522 | 2.02  | 4.61 |
| 100 | 1.05  | 6.23 | 20.2 | 1.29 | 1.23 | 5.29 | 1.538 | 1.27  | 5.49 |

Table S4: Equivalent circuit element values taken from the fitted EIS results at different SOC recorded at  $-5^{\circ}\text{C}$

| SOC % | NMC   |           |          |          | SB25  |           |          | B25   |           |          |
|-------|-------|-----------|----------|----------|-------|-----------|----------|-------|-----------|----------|
|       | $R_S$ | $R_{SEI}$ | $R_{CT}$ | $R_{CT}$ | $R_S$ | $R_{SEI}$ | $R_{CT}$ | $R_S$ | $R_{SEI}$ | $R_{CT}$ |
| 0     | 2.58  | 12.1      | 98.8     | -        | 2.72  | 7.82      | 1530     | 3.37  | 15.4      | 419      |
| 10    | 2.67  | 18.3      | 75.9     | 346      | 1.94  | 11.04     | 154      | 3.22  | 13.1      | 236      |
| 20    | 2.73  | 17.3      | 64.6     | 132      | 1.88  | 8.24      | 116      | 3.34  | 11.6      | 177      |
| 30    | 2.70  | 16.8      | 58.7     | 100      | 1.32  | 8.61      | 101      | 3.29  | 11.8      | 183      |
| 40    | 2.65  | 16.5      | 55.8     | 115      | 1.03  | 8.46      | 91.5     | 3.26  | 11.7      | 182      |
| 50    | 2.56  | 16.2      | 50.7     | 136      | 1.19  | 7.46      | 86.5     | 3.23  | 11.4      | 172      |
| 60    | 2.51  | 15.7      | 51.2     | 161      | 1.55  | 6.20      | 84.3     | 3.23  | 11.7      | 190      |
| 70    | 2.40  | 15.5      | 50.1     | 305      | 2.09  | 4.87      | 80.0     | 3.20  | 11.3      | 173      |
| 80    | 2.36  | 15.7      | 51.2     | 348      | 1.06  | 6.91      | 74.7     | 3.28  | 11.9      | 216      |
| 90    | 2.36  | 15.5      | 50.5     | 356      | 1.02  | 6.98      | 76.7     | 3.26  | 11.8      | 210      |
| 100   | 2.33  | 15.4      | 49.8     | 717      | 0.86  | 7.22      | 71.4     | 4.62  | 7.01      | 232      |

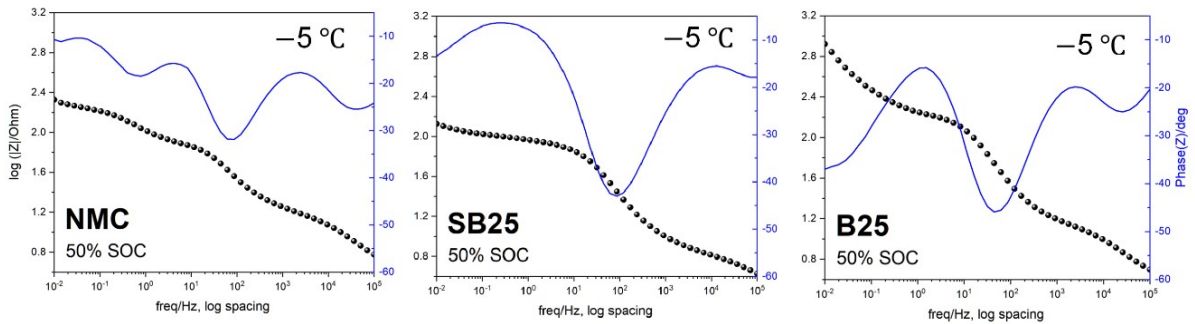

Figure S3: Bode plots from EIS measurements in cathode half-cells recorded at 50% SOC tested at  $-5^{\circ}\text{C}$ .

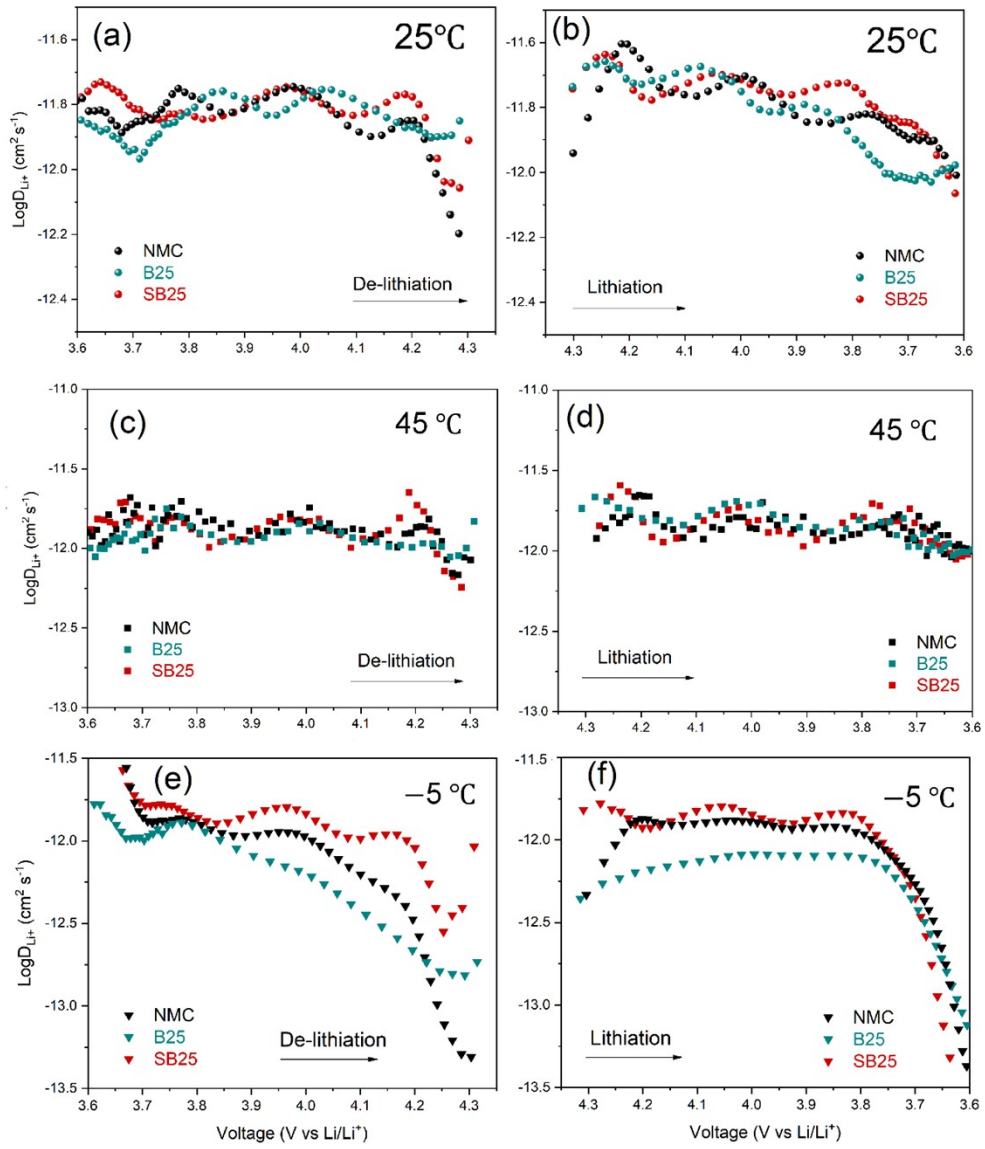

Figure S4: GITT results showing the log of the diffusion coefficients during charge (a, c, d) and discharge (b, d, f) at room temperature (a, b), 45 °C (c, d), and -5 °C (e, f).

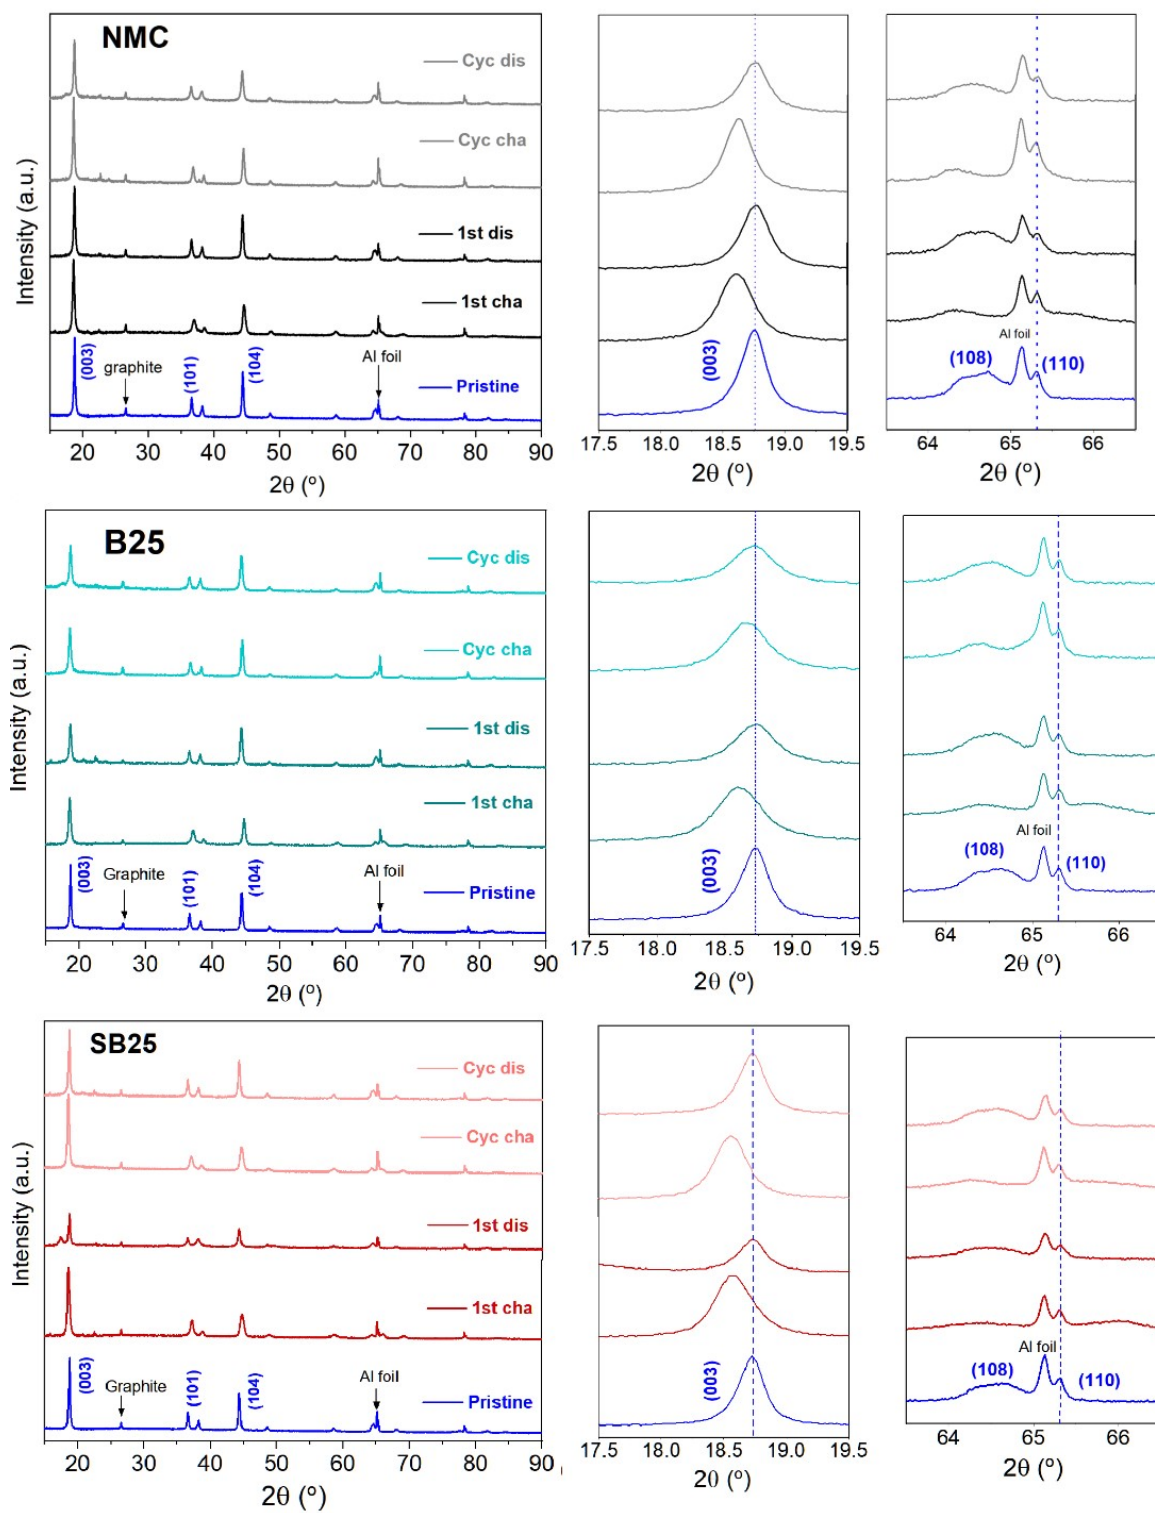

Figure S5: Ex-situ XRD patterns collected on electrodes from cells cycled between 4.3 – 2.5 V at 10 mA g<sup>-1</sup> during the first formation cycle and in after 20 cycles at a discharge rate of 500 mA g<sup>-1</sup>.

Table S5: Peak positions of the (003) reflection in the pristine electrode and electrodes in the charged state during the 1<sup>st</sup> cycle and after 20 cycles at 500 mA g<sup>-1</sup>.

| Cathode | (003) 2 $\theta$ position/ $^{\circ}$ |                         |              | $\Delta(003)_{\text{Pristine} - 4.3 \text{ V}}$ |        |
|---------|---------------------------------------|-------------------------|--------------|-------------------------------------------------|--------|
|         | Pristine                              | 1 <sup>st</sup> (4.3 V) | Cyc. (4.3 V) | 1st                                             | Cyc.   |
| NMC     | 18.763                                | 18.612                  | 18.631       | -0.151                                          | -0.132 |
| B25     | 18.726                                | 18.593                  | 18.669       | -0.133                                          | -0.057 |
| SB25    | 18.726                                | 18.574                  | 18.555       | -0.152                                          | -0.171 |

Table S6: Lattice parameters calculated from Rietveld refinements of the as made NMC, B25, and SB25 pristine electrodes and ex-situ XRD measurements of these electrodes at the end of charge (4.3 V) and end of discharge (2.5 V) of the 1<sup>st</sup> formation cycle and after 20 cycles at 500 mA g<sup>-1</sup>.

| Cathode | Sample              | a/ $\text{\AA}$ | c/ $\text{\AA}$ | Volume/ $\text{\AA}^3$ | Rwp % |
|---------|---------------------|-----------------|-----------------|------------------------|-------|
| NMC     | Pristine            | 2.877486        | 14.17593        | 101.65                 | 12.76 |
| NMC     | 1 <sup>st</sup> Cha | 2.850072        | 14.27104        | 100.392                | 14.00 |
| NMC     | 1 <sup>st</sup> Dis | 2.875671        | 14.1933         | 101.646                | 8.41  |
| NMC     | Cyc Cha             | 2.85847         | 14.26823        | 100.964                | 15.80 |
| NMC     | Cyc Dis             | 2.880743        | 14.20206        | 102.068                | 14.41 |
| B25     | Pristine            | 2.880283        | 14.19949        | 102.017                | 10.90 |
| B25     | 1 <sup>st</sup> Cha | 2.842672        | 14.27468        | 99.897                 | 10.15 |
| B25     | 1 <sup>st</sup> Dis | 2.881105        | 14.20655        | 102.126                | 11.04 |
| B25     | Cyc Cha             | 2.866755        | 14.25965        | 101.489                | 10.89 |
| B25     | Cyc Dis             | 2.884258        | 14.19168        | 102.243                | 12.35 |
| SB25    | Pristine            | 2.880686        | 14.18203        | 101.92                 | 16.17 |
| SB25    | 1 <sup>st</sup> Cha | 2.834774        | 14.30991        | 99.587                 | 10.30 |
| SB25    | 1 <sup>st</sup> Dis | 2.882279        | 14.2288         | 102.37                 | 15.09 |
| SB25    | Cyc Cha             | 2.840289        | 14.27736        | 99.748                 | 13.79 |
| SB25    | Cyc Dis             | 2.881046        | 14.21989        | 102.218                | 9.80  |

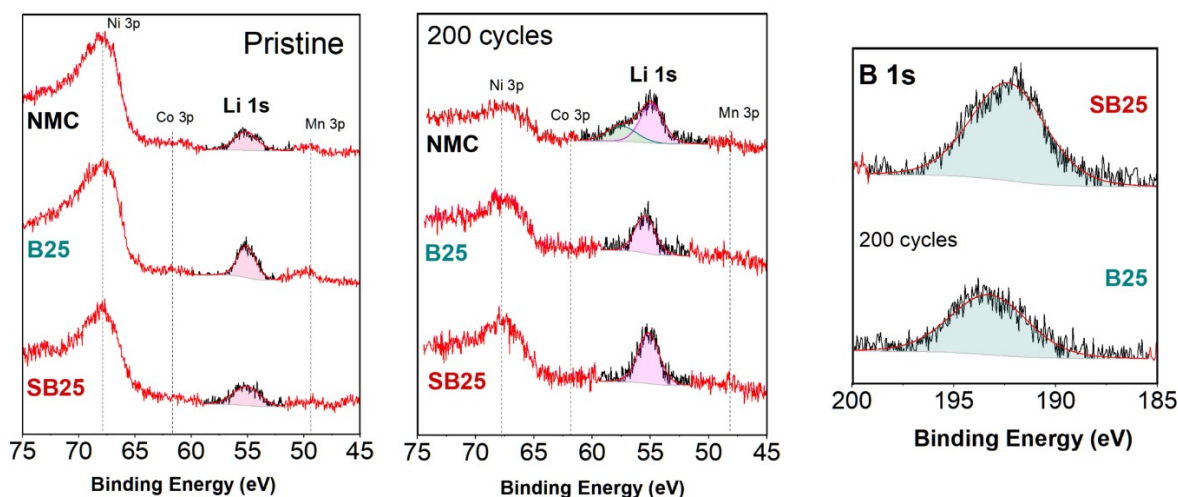

Figure S6: XPS results showing the Li 1s spectra of the pristine and aged NMC cathode electrodes, and the B 1s spectra of the SB2 and B25 cycled electrodes.

Table S7 Summary of doped high nickel NMC materials, and their electrochemical performance properties

| Material                                                                           | Dopant / strategy<br>Mol %                    | Voltage (V) | Retention         | Cycles (rate)     | Initial cap. mAh g <sup>-1</sup> | Rate cap. (500 mA g <sup>-1</sup> )                               | T tested °C | Ref. |
|------------------------------------------------------------------------------------|-----------------------------------------------|-------------|-------------------|-------------------|----------------------------------|-------------------------------------------------------------------|-------------|------|
| NMC955 this work                                                                   | Sn–B co-doped 2.5% (SB25)                     | 2.5–4.3     | 88.7%             | 100 (1C)          | 210                              | 157 mAh g <sup>-1</sup> (45 °C)<br>91 mAh g <sup>-1</sup> (-5 °C) | -5, 25, 45  | —    |
| NMC955 this work                                                                   | B-doped 2.5% (B25)                            | 2.5–4.3     | 92.7%             | 100 (1C)          | 191 <sup>1</sup>                 | 140 mAh g <sup>-1</sup> (45 °C)<br>42% retention (-5 °C)          | -5, 25, 45  | —    |
| NMC955 this work                                                                   | Undoped NMC                                   | 2.5–4.3     | 78%               | 100 (1C)          | 208                              | 133 mAh g <sup>-1</sup> (45 °C)<br>73 mAh g <sup>-1</sup> (-5 °C) | -5, 25, 45  | —    |
| NMC955 (NCM90)                                                                     | B-doped 1                                     | 3.0–4.3     | 91%               | 100 (0.5C, 55 °C) | 237                              | Not reported                                                      | 55 °C only  | 1    |
| LiNi <sub>0.92</sub> Co <sub>0.04</sub> Mn <sub>0.04</sub> O <sub>2</sub>          | B Doped 1<br>P Doped 1                        | 3.0–4.4     | 80%<br>75%        | 100<br>0.3C       | 225                              | 170 mAhg <sup>-1</sup> @2C                                        | RT only     | 2    |
| NCA95 (LiNi <sub>0.95</sub> Co <sub>0.04</sub> Al <sub>0.01</sub> O <sub>2</sub> ) | B-doped 1.5                                   | 3.0–4.3     | 88%               | 100 (0.5C)        | ~230                             | Not reported                                                      | 30 °C       | 3    |
| NCM90 (LiNi <sub>0.9</sub> Co <sub>0.1</sub> O <sub>2</sub> )                      | B-doped 0.5<br>Mo-doped 0.5<br>B-Mo 0.25-0.25 | 3.0–4.3     | 80%<br>95%<br>90% | 100 (1C)          | 234                              | Not reported                                                      | RT only     | 4    |
| NMC811                                                                             | Ti-doped (bulk + surface) 0.9%                | 2.8–4.3     | 91.5%             | 100 (C/3)         | ~190                             | ~155 @3C                                                          | RT only     | 5    |
| NMC811                                                                             | Zr-doped 0.1 mol% (co-precip.)                | 3.0–4.4     | 85%               | 100 (1C)          | 205                              | 150 @5C                                                           | RT only     | 6    |

Note: direct quantitative comparisons are limited by differences in voltage window, current density, cell format and temperature. Capacity retention values for this work are quoted after 100 cycles at ~1C (200 mA g<sup>-1</sup> discharge). "RT" = room temperature. Rate capability at 500 mA g<sup>-1</sup> at -5 °C and 45 °C is a distinguishing feature of the present work not reported in any of the listed references.

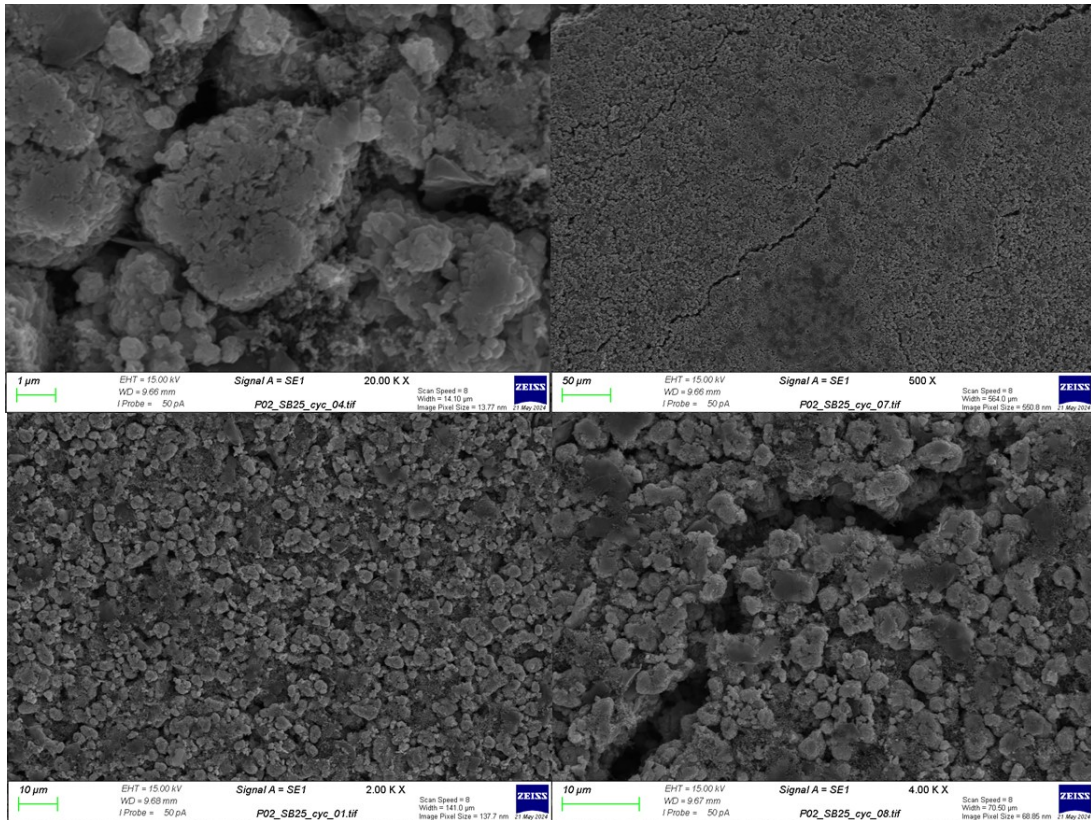

Figure S7: SEM images of the NMCSB25 from a cycled single layer pouch cell vs graphite, 200 cycles at 200 mA/g

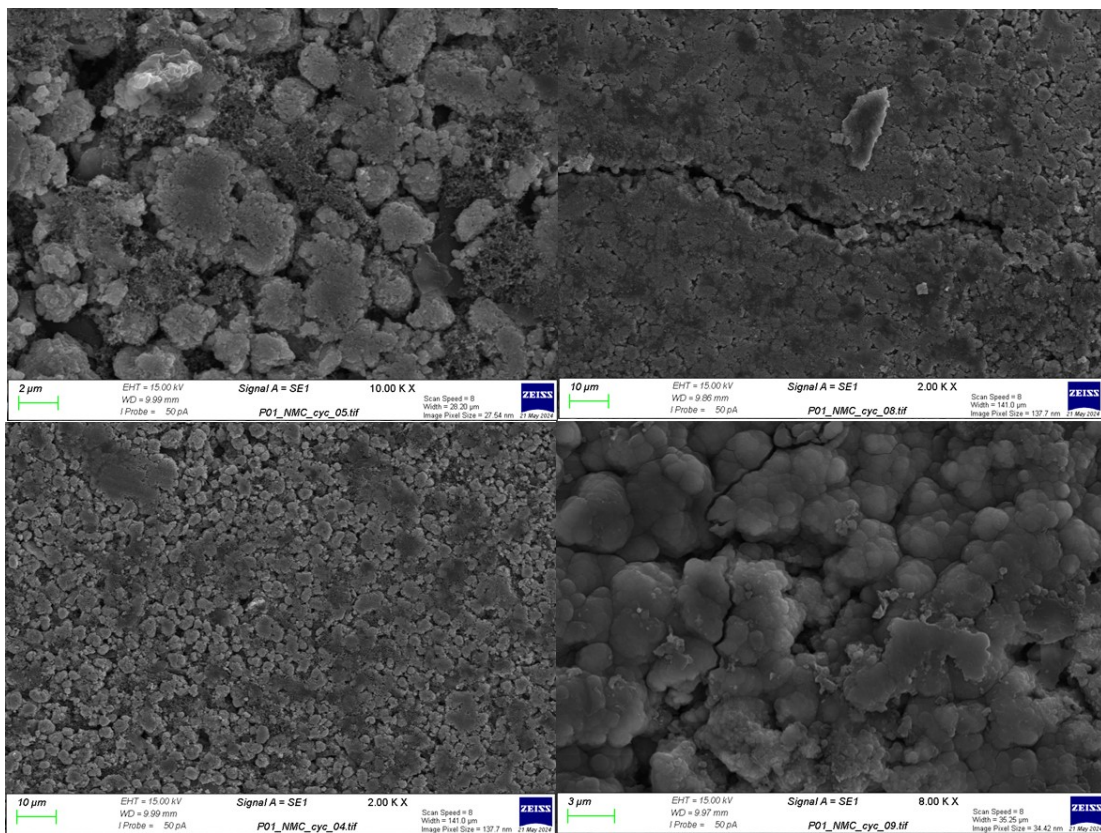

Figure S8: SEM images of the NMC, from a cycled single layer pouch cell vs graphite, 200 cycles at 200 mA/g

- 1 K.-J. Park, H.-G. Jung, L.-Y. Kuo, P. Kaghazchi, C. S. Yoon, Y.-K. Sun, K.-J. Park, Y.-K. Sun, H.-G. Jung, L.-Y. Kuo, P. Kaghazchi and C. S. Yoon, *Adv. Energy Mater.*, 2018, **8**, 1801202.
- 2 C.-H. Jung, D.-H. Kim, D. Eum, K.-H. Kim, J. Choi, J. Lee, H.-H. Kim, K. Kang, S.-H. Hong, C. Jung, D. Kim, D. Eum, K. Kim, J. Choi, J. Lee, H. Kim, K. Kang and S. Hong, *Adv. Funct. Mater.*, 2021, **31**, 2010095.
- 3 Y. S. Kim, J. H. Kim, Y. K. Sun and C. S. Yoon, *ACS Appl. Mater. Interfaces*, 2022, **14**, 17500–17508.
- 4 F. A. Susai, A. Bano, S. Maiti, J. Grinblat, A. Chakraborty, H. Sclar, T. Kravchuk, A. Kondrakov, M. Tkachev, M. Talianker, D. T. Major, B. Markovsky and D. Aurbach, *J. Mater. Chem. A Mater.*, 2023, **11**, 12958–12972.
- 5 F. Bizzotto, W. Dachraoui, R. Grissa, W. Zhao, F. Pagani, E. Querel, R. S. Kühnel and C. Battaglia, *Electrochim. Acta*, 2023, **462**, 142758.
- 6 M. Colalongo, B. Ali, I. Martens, M. Mirolo, E. Laakso, C. Atzori, G. Confalonieri, P. Kus, A. Kobets, X. Kong, T. Schulli, J. Drnec, T. Kankaanpää and T. Kallio, *ACS Appl. Mater. Interfaces*, 2024, **16**, 28683–28693.
